# Supplementary material for: Characterizing the behavioral phenotypes of phobic avoidance
Source: Research Square preprint supplement (doi:10.21203/rs.3.rs-7534187/v1), 2025-10-15

# Supplementary materials

#### Supplementary table 1: all recurrences of the word “avoidance” and its direct derivatives in the DSM-5 symptoms of 20 different disorders (26, considering as separate the subtypes1 of *Substance use disorder*), selected from the file “DSM mapped to survey.xlsx” openly shared by Forbes et al. (2024) at the Open Science Framework repository https://osf.io/urpqt

| DSM-5 Disorder | **Constituent symptom** (wording from DSM-5) |
| --- | --- |
| Specific Phobia | The phobic object or situation is actively avoided |
| Agoraphobia | The agoraphobic situations are feared or actively avoided |
| Social Anxiety Disorder | Social situations are avoided |
| Panic Disorder | A significant maladaptive change in behavior related to the attacks (e.g., behaviors designed to avoid having panic attacks, such as avoidance of exercise or unfamiliar situations) |
| Posttraumatic Stress Disorder | Avoidance of or efforts to avoid distressing memories, thoughts, or feelings about or closely associated with the traumatic event(s). Avoidance of or efforts to avoid external reminders (people, places, conversations, activities, objects, situations) that arouse distressing memories, thoughts, or feelings about or closely associated with the traumatic event(s) |
| Acute Stress Disorder | Efforts to avoid distressing memories, thoughts, or feelings about or closely associated with the traumatic event(s). Efforts to avoid external reminders (people, places, conversations, activities, objects, situations) that arouse distressing memories, thoughts, or feelings about or closely associated with the traumatic event(s) |
| Adjustment Disorders | Behavioral symptoms (symptoms coded for 'Disturbance of conduct'): Often lies to avoid obligations (i.e., “cons” others) |
| Illness Anxiety Disorder | Maladaptive avoidance (e.g., avoids doctor appointments and hospitals) |
| Avoidant/Restrictive Food Intake Disorder | Avoidance based on the sensory characteristics of food |
| Nightmare Disorder | Repeated occurrences of extended, extremely dysphoric, and well-remembered dreams that usually involve efforts to avoid threats to survival, security, or physical integrity and that generally occur during the second half of the major sleep episode |
| Childhood-Onset Fluency Disorder (Stuttering) | Circumlocutions (word substitutions to avoid problematic words) |
| Social (Pragmatic) Communication Disorder | Impairment of the ability to change communication to match context or the needs of the listener, such as speaking differently in a classroom than on a playground, talking differently to a child than to an adult, and avoiding use of overly formal language |
| Attention-Deficit/Hyperactivity Disorder | Often avoids, dislikes, or is reluctant to engage in tasks that require sustained mental effort (e.g., schoolwork or homework; for older adolescents and adults, preparing reports, completing forms, reviewing lengthy papers) |
| Conduct Disorder | Often lies to avoid obligations (i.e., “cons” others) |
| Substance1 Use Disorder | The substance (or a closely related substance) is taken to relieve or avoid withdrawal symptoms |
| Mild Neurocognitive Disorder | Modest decline in language: May avoid use of specific names of acquaintances |
| Neurocognitive Domains - Language | May avoid use of specific names of acquaintances |
| Detachment - Intimacy avoidance | Avoiding romantic relationships |
| Detachment - Withdrawal | Avoiding social events |
| Disinhibition - Irresponsibility | Disappearing without telling anyone to avoid responsibilities |
| 1*Alcohol, Cannabis, Opioid, Tobacco, sedative, hypnotic, anxiolytic, stimulant substances* | |

#### Supplementary table 2: methodological properties and limitations of previous paradigms more (black ink) or less (dark-gray ink) comparable to that described in the present study

| Reference | PC/  VR | N | behavioral correlates | real-BAT comparison | features or limitations |
| --- | --- | --- | --- | --- | --- |
| Meng et al., 2004 | PC | 64 | *Distance* | ✓ | outdated graphic |
| Mühlberger et al., 2008 | VR | 34 | *Distance* | ✗ | outdated graphic |
| Taffou et al., 2013 | VR | 22 | ✗ | ✗ | focused on cynophobia |
| Dibbets & Fonteyne, 2015 | VR | 44 | *Distance*, *Time* | ✓ | non immersive (PC) |
| Healey et al., 2017 | PC | 96 | *Distance* | ✗ | non immersive (PC) |
| Verger et al., 2018 | VR | 18 | *Distance* | ✗ | focused on acrophobia |
| Ruiz-García et al., 2019 | PC | 160 | ✗ | ✗ | focused on BII3 phobia |
| Binder & Spoormaker, 2020 | VR | 55+72 | *Distance* | ✗ | not focused on phobias |
| 4Shiban et al., 2013  4Shiban et al., 2015  4Reitmaier et al., 2022 | VR | 30  58  53 | *Distance* | ✓ | unrealistically-big dimensions  of the spider |
| Grill et al., 2024 | PC | 62 | levels completion | ✓ | non immersive (PC) |

1Skin conductance (including all variables derivable from it)

2Heart rate (including all variables derivable from it) 3BII = blood/injury/injection phobia

4These studies declared using the same paradigm to measure phobic avoidance, thus sharing the same properties where not differently specified

####

#### Supplementary table 3: age and gender of participants depending on SPQ, and their expectations about the taxidermic spider shown in the real-BAT

| *Participants’ subdivision*  *based on SPQ scorings* | *Age*  *mean (SD)* | *% of females (F);*  *% of males (M)* | *1“I believed*  *it was alive”* |
| --- | --- | --- | --- |
| **All** (from SPQ = 0 to SPQ = 30) | 25.28 (3.89) | 65% (F); 35% (M) | 69.81% |
| **Low** fear of spiders  (SPQ <10) | 26.32 (3.89) | 48% (F); 52% (M) | 64.70% |
| **Intermediate** fear of spiders  (SPQ >10<20) | 24,75 (4,74) | 60% (F); 40% (M) | 56.52% |
| **High** fear of spiders  (SPQ >20) | 24,52 (2,81) | 88% (F); 12% (M) | 88.23% |

*1 this feedback is extracted from a post-session questionnaire where multiple answers were allowed: in a minority of cases (6%), the participant did not unambiguously specify whether the taxidermic spider was identified as a taxidermy or not (by marking more contradictory answers, e.g., “I thought it was moving” and “I thought it was a taxidermy”). These participants were thus excluded from this calculation*

####

#### Supplementary table 4: contingency table of participants touching the spider in real-BAT and vr-BAT, showing that among the 52 participants who completed both sessions only 7 had an incongruent behavior between the two conditions (other 12 participants completed both sessions but a technical issue prevented the recording of the spider touching, which led to the exclusion of their data from this analysis)

|  |  | **vr-BAT** | |
| --- | --- | --- | --- |
|  |  | *touched the spider* | *did not touch the spider* |
| **real-BAT** | *touched the spider* | 34 | 4 |
| *did not touch the spider* | 3 | 11 |

####

#### Supplementary table 5: dropouts (i.e., participants who did only one of the two sessions) causing partial data loss

| *Participants’ subdivision*  *based on SPQ scorings* | *Did the vr-BAT only* | *Did the real-BAT only* | *Did both BATs* |
| --- | --- | --- | --- |
| **All** (from SPQ = 0 to SPQ = 30) | 9 | 3 | 64 |
| **Low** fear of spiders (SPQ <10) | 4 | 2 | 20 |
| **Intermediate** fear of spiders (SPQ >10<20) | 2 | 1 | 21 |
| **High** fear of spiders (SPQ >20) | 3 | 0 | 23 |

#### Supplementary video 1: A video representing the experimental setting and procedure with participants not included in the analyses. Higher-definition versions are available on the OSF repository


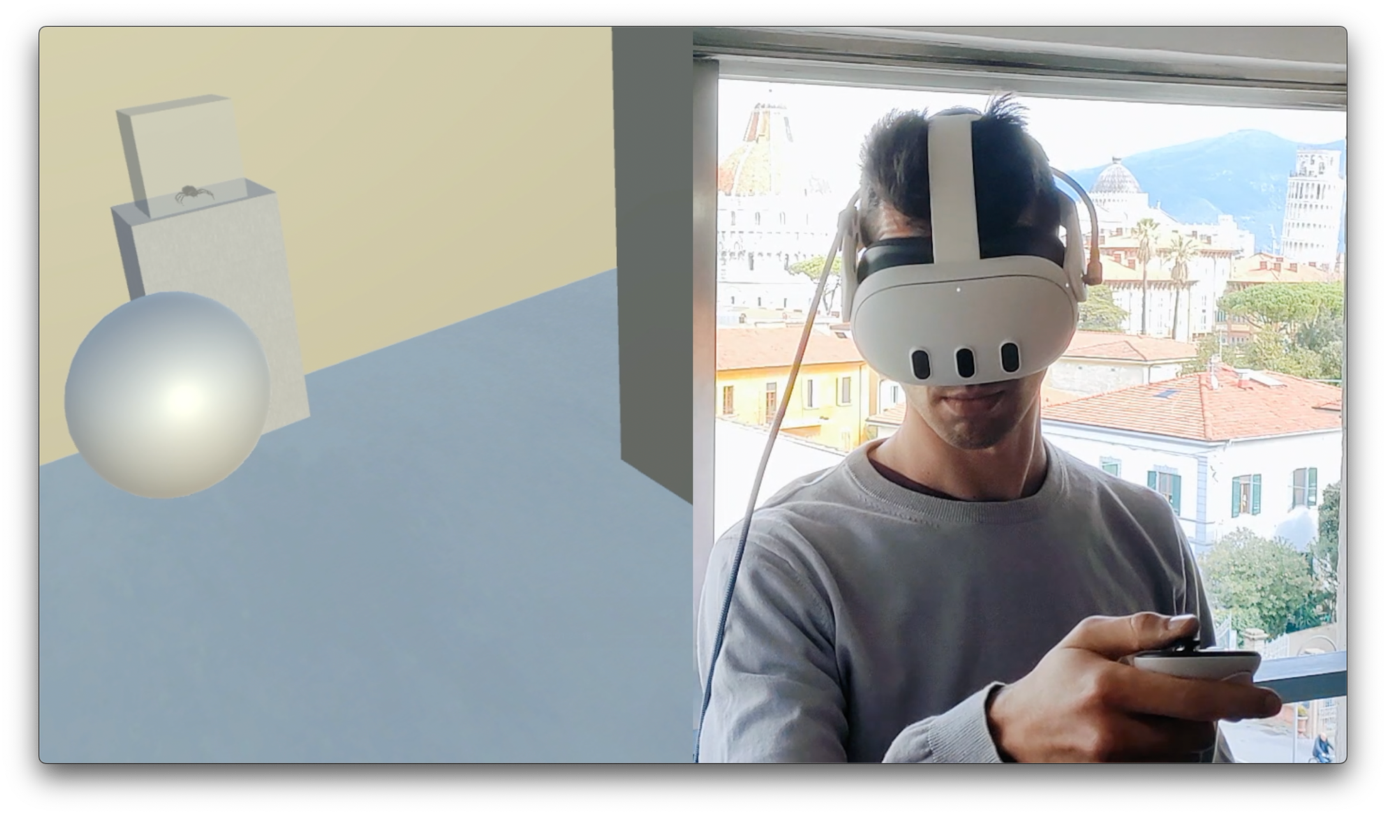

Supplement: Supplementary file 1 [file a42bd622f682729bade579dc.docx]
